# Supplementary material for: Chitosan-based core–shell structured particles for in vivo sustainable gene transfection
Source: Royal Society of Chemistry journal article supplement (doi:10.1039/c5tb02074c), 2015-12-21
Supplement: c5tb02074c1.pdf [file c5tb02074c1.pdf]

# Supporting Information

## **Chitosan-based core-shell structured particles for in vivo sustainable gene transfection**

Fu-xing Lin<sup>1</sup>, Jie-lin Rong<sup>2</sup>, Mo-zhen Wang<sup>1\*</sup>, Dan-dan Bao<sup>2</sup>, Yun Wang<sup>2</sup>, Zhen-xing Gong<sup>2</sup>,  
Yu-fang Gu<sup>2</sup>, Yu Zhao<sup>2\*</sup>, Xue-wu Ge<sup>1</sup>

<sup>1</sup>CAS Key Laboratory of Soft Matter Chemistry, Department of Polymer Science and Engineering, University of Science and Technology of China, Hefei, Anhui 230026, PR China

<sup>2</sup>Department of Plastic Surgery, The First Affiliated Hospital of Anhui Medical University, Hefei, Anhui 230032, PR China

\*To whom the correspondence should be addressed. E-mail: pstwmz@ustc.edu.cn; Tel: +86-551-63600843; zhaoyuzj@aliyun.com; Fax: +86-551-63601592

### **1. Biodegradation of EG-HBC**

The synthesized EG-HBC was dissolved in an acetic solution (2%) at a concentration of 1 mg/mL. Then the solution was poured into a petri dish, dried in an air oven at 45 °C to get a thin EG-HBC film. The obtained EG-HBC thin film was immersed into 50 mL of the aqueous solution of lysozyme (0.5 mg/mL). The status of EG-HBC film were recorded in digital photos at different time, as shown in Figure S1. It is clearly seen that a lot of bubbles appear on the film indicating the degradation of EG-HBC begins since the products of the degradation of CS include carbon dioxide. The EG-HBC film cannot be clearly observed after 24 h, and 72 h later, totally disappears.

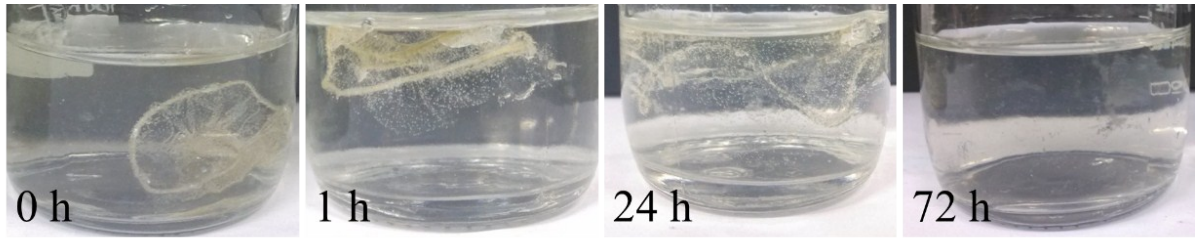

Figure S1. The biodegradation process of EG-HBC film in the aqueous solution of lysozyme at room temperature.

## 2. Zeta potentials of *p*EGFP-loaded CS-based particles.

Zeta potentials of different particles in the aqueous solution of acetic acid were measured by dynamic light scattering (Nano-ZS90, Malvern, UK).

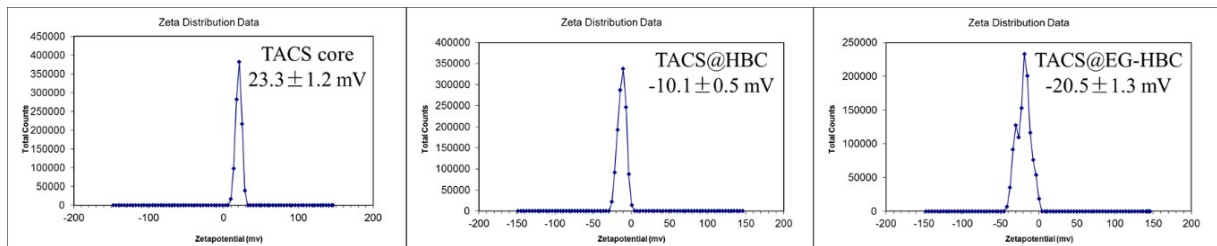

Figure S2. Zeta potential of *p*EGFP-loaded CS-based particles.

## 3. FACS graphs.

Fluorescence activated cell sorting (FACS) was used to characterize the gene transfection efficiency of *p*EGFP-loaded on different carriers.

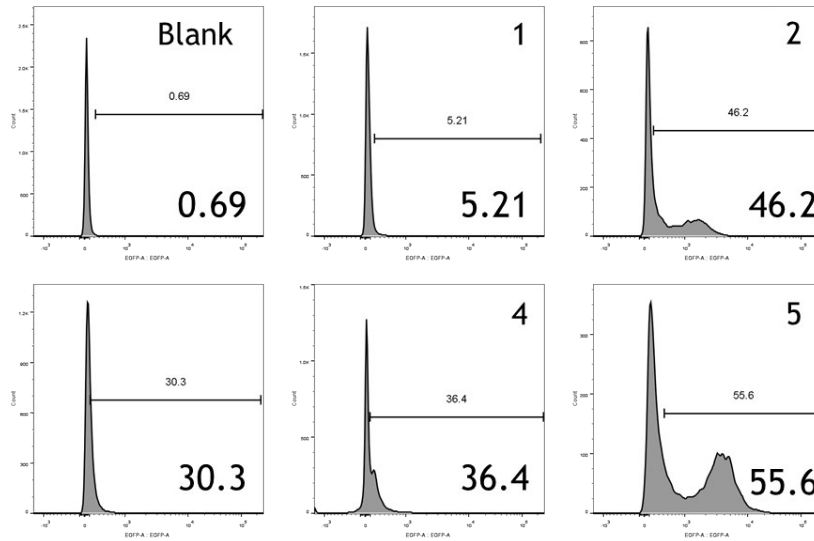

Figure S3. FACS graphs of in vitro gene transfection of *pEGFP* loaded on different carriers (1: CS; 2: TACS; 3: TACS@HBC; 4: TACS@EG-HBC; 5: Lip2000).

### 3. The luciferase assay.

Hela cell lines (derived from cervix carcinoma cells of human) were cultured in DMEM-high glucose (HyClone) containing heat-inactivated 10% fetal bovine serum (FBS, Gibco-BRL) and 1% penicillin-streptomycin. Then, Hela cells were seeded in 24-well plates at a density of  $3 \times 10^4$  per well, and grew overnight at 37 °C in CO<sub>2</sub> incubator. The high glucose DMEM in each well was all removed. The wells were washed with 0.5 mL of serum-free DMEM. Then, 100  $\mu$ L of serum-free DMEM medium containing luciferase reporter gene plasmid (*pLRG*) or *pLRG*-loaded particles (*pLRG* for each well was 4  $\mu$ g) was injected into each well. For comparison, a group of *pLRG*-loaded Lip2000 was set as the positive control, another group of 100  $\mu$ L fresh serum-free DMEM medium as the blank control. After 4 hours' incubation, the mediums in all wells were replaced by fresh DMEM medium with 10% FBS. After 48 h, mediums were all replaced with 100  $\mu$ L of lysis buffer for each well, and after that another 50

μL of luciferase detection reagent was added, the result was measured by a microplate reader.

As Figure S4 showed,

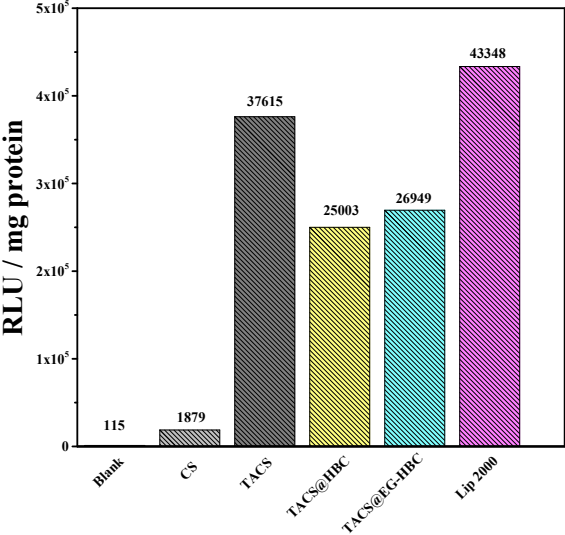

Figure S4. The luciferase assay of *p*LRG loaded on different carriers
